# Supplementary material
Source: PubMed Central journal article supplement (PMC3147167)

Fig. S1

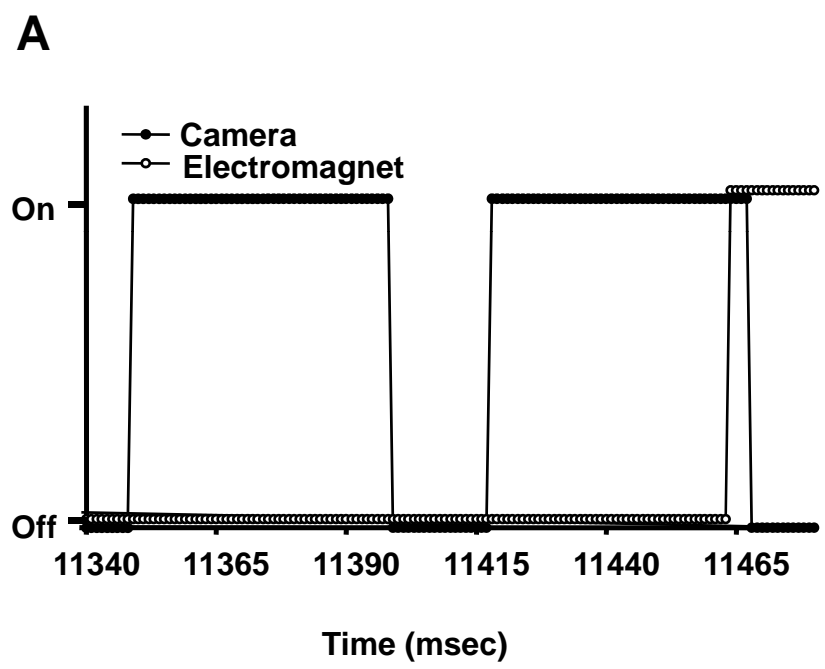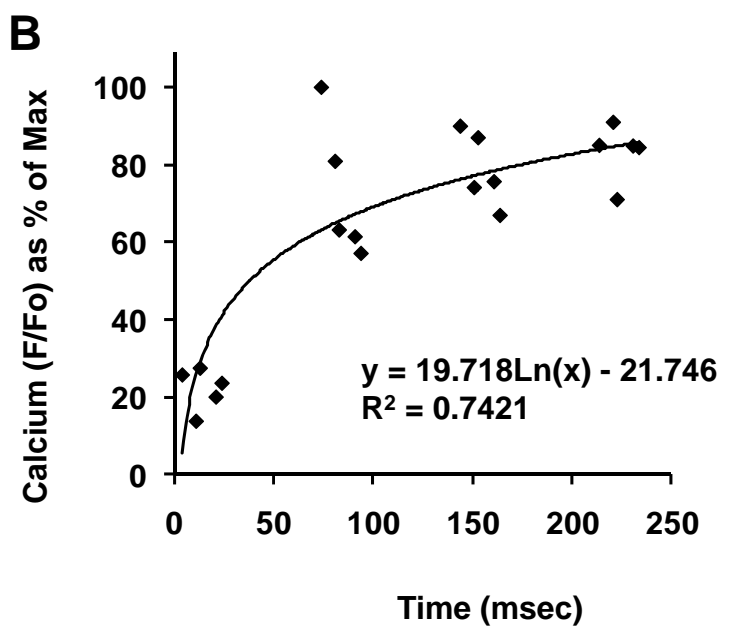

Fig. S2

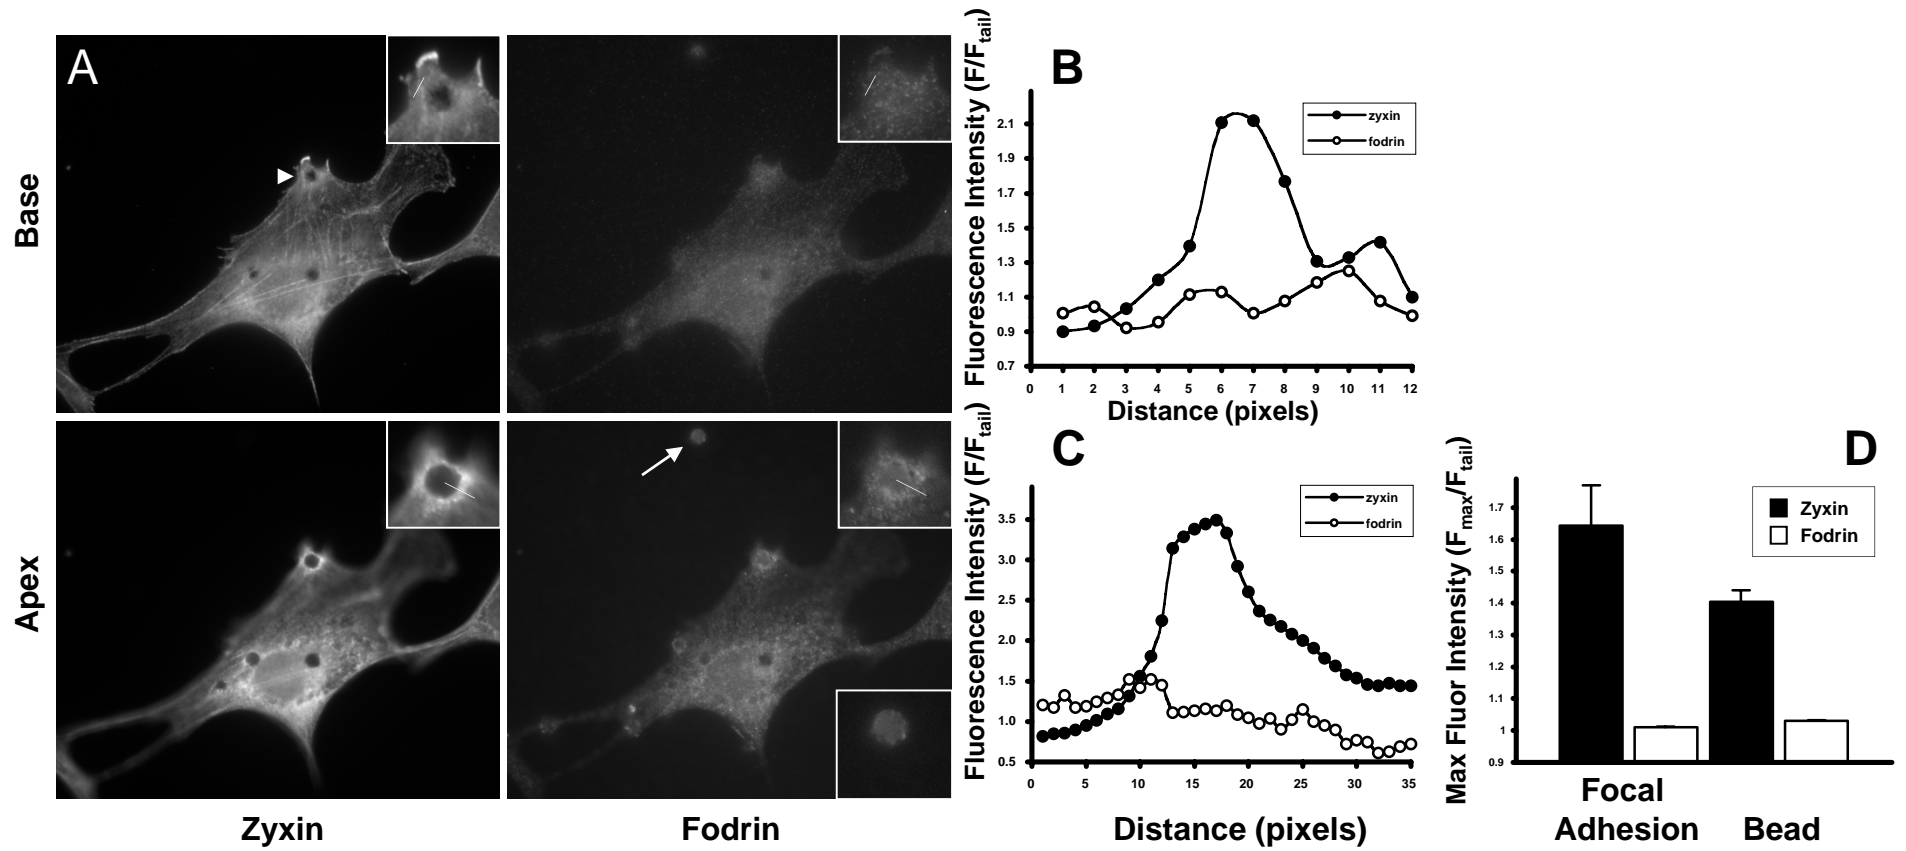

**Fig. S3**

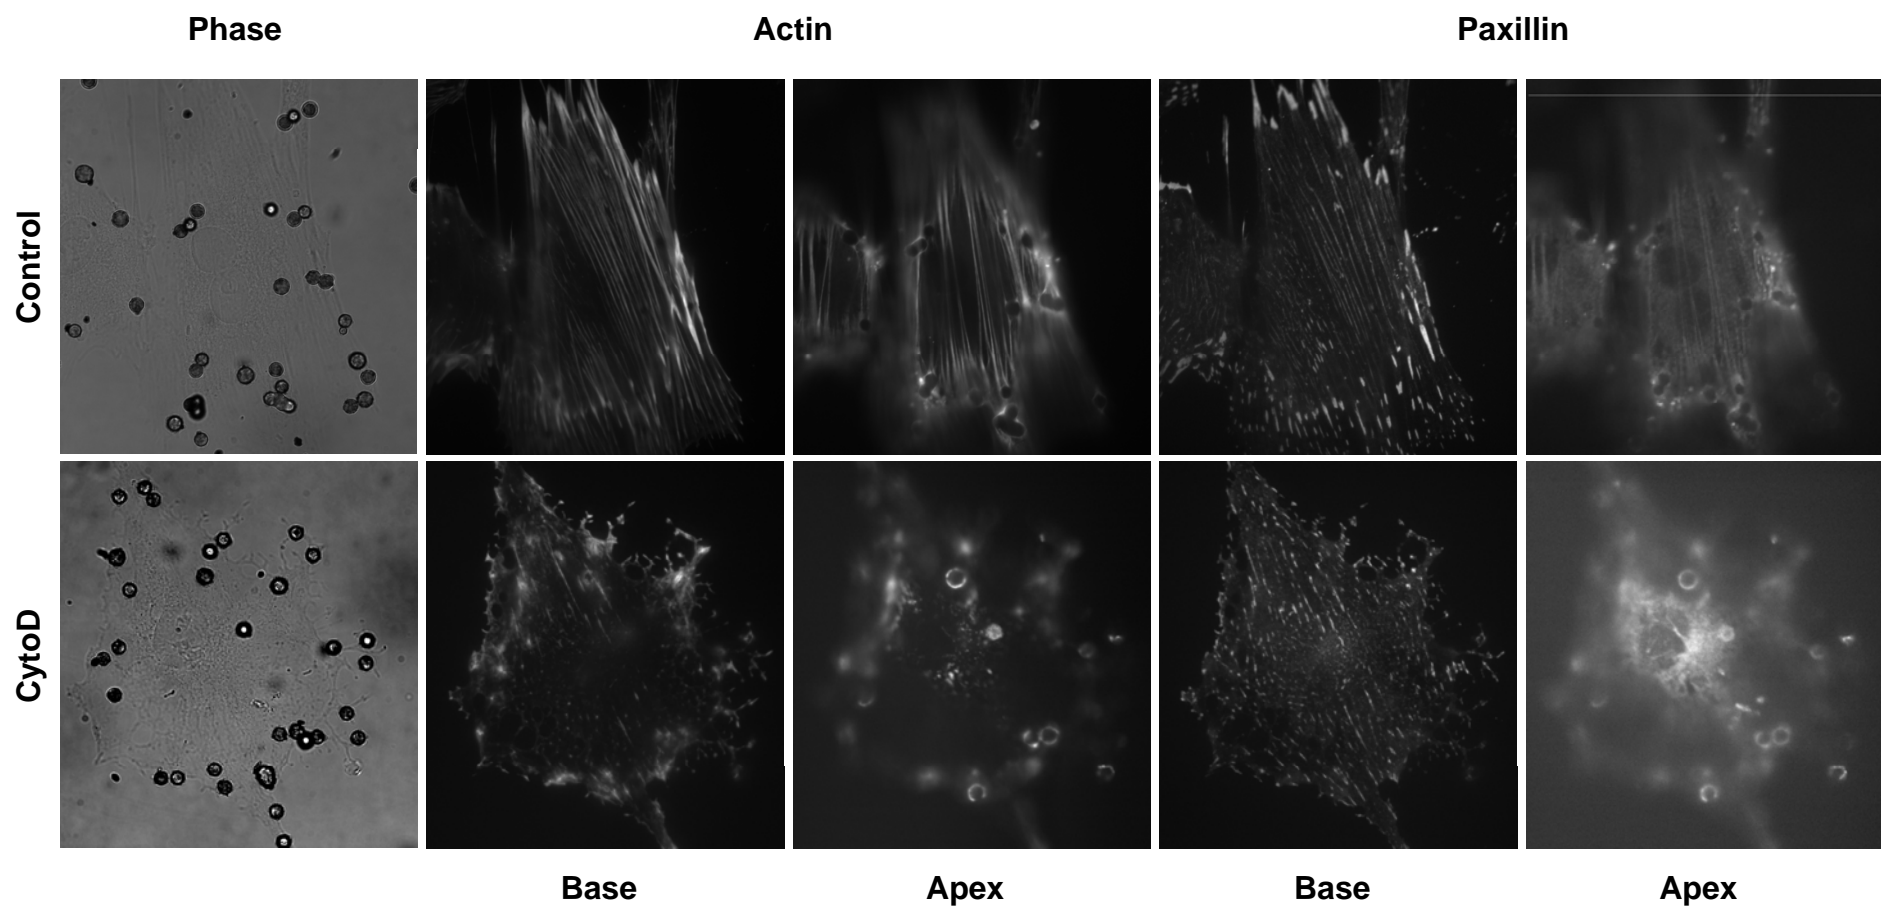

Fig. S4

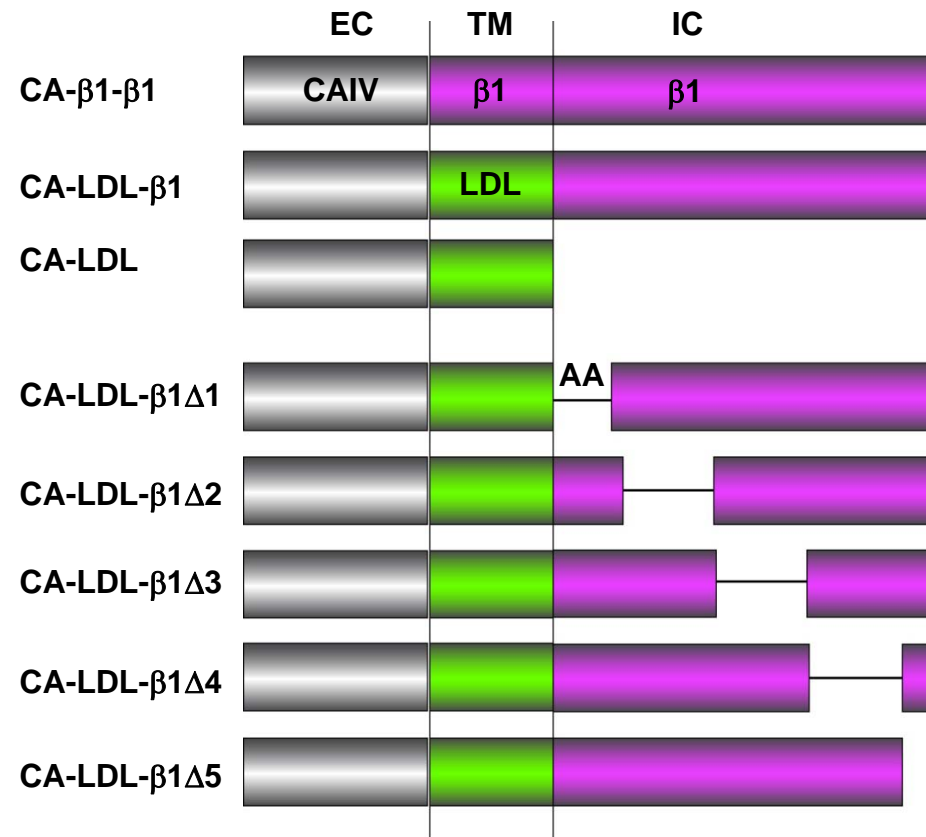

**Fig. S5**

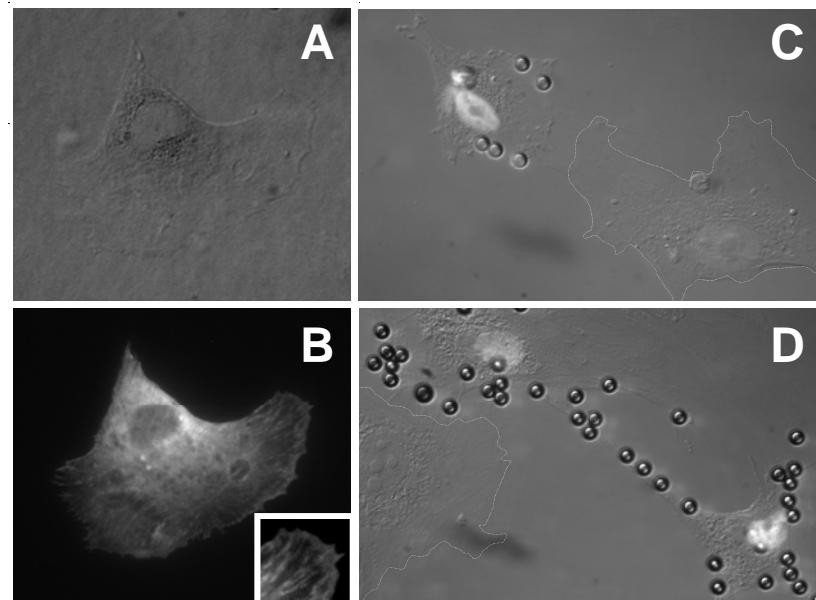

Fig. S6

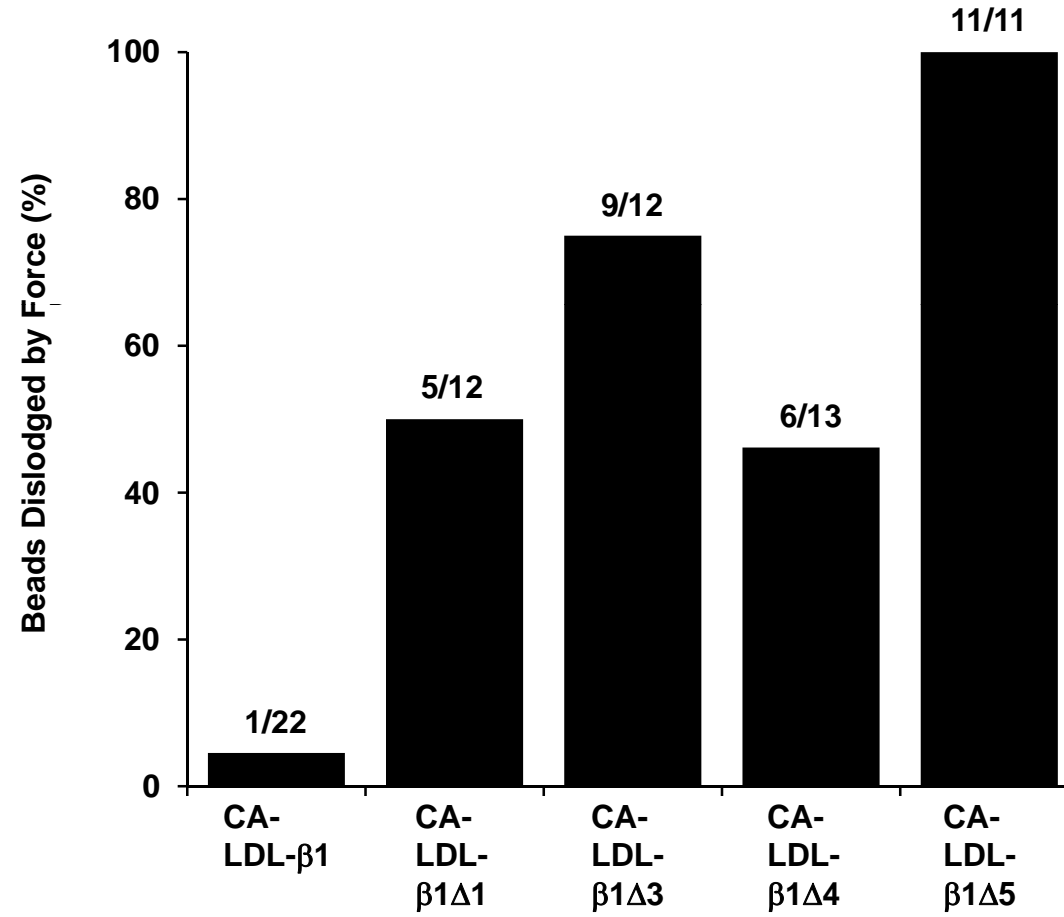

**Fig. S7**

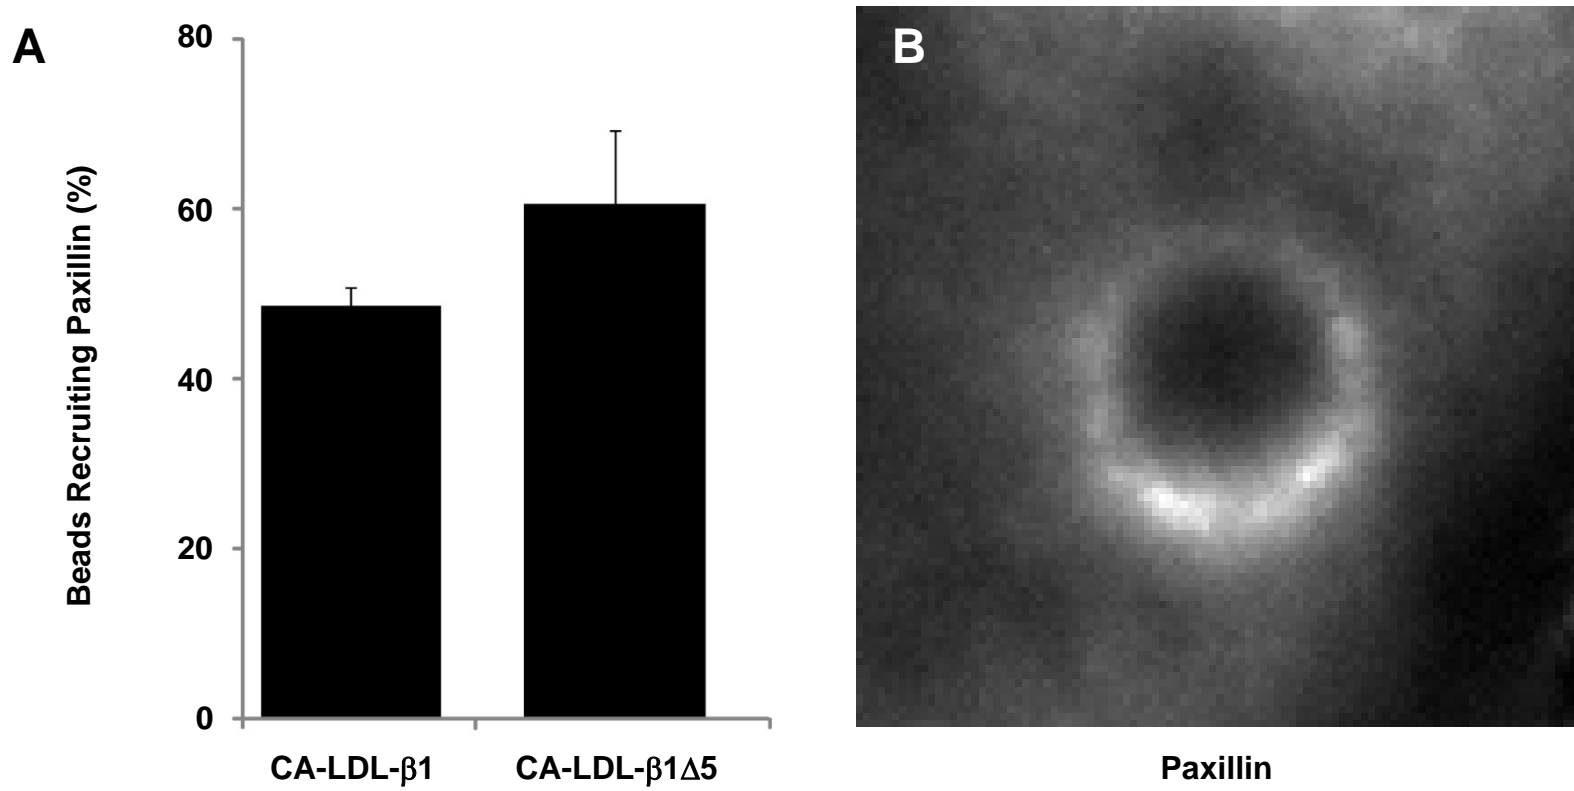

Fig. S8

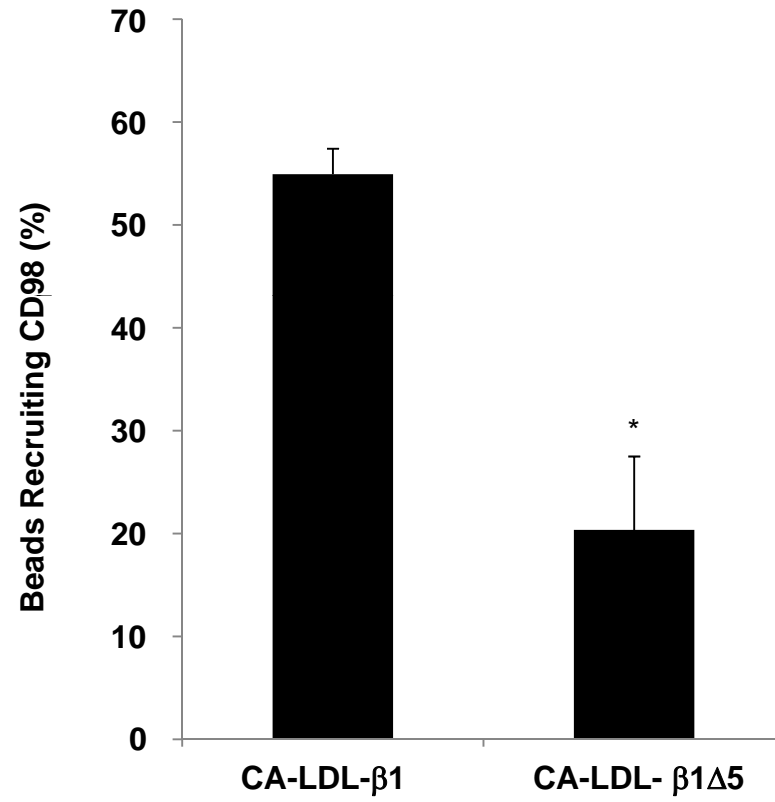



Fig. S9

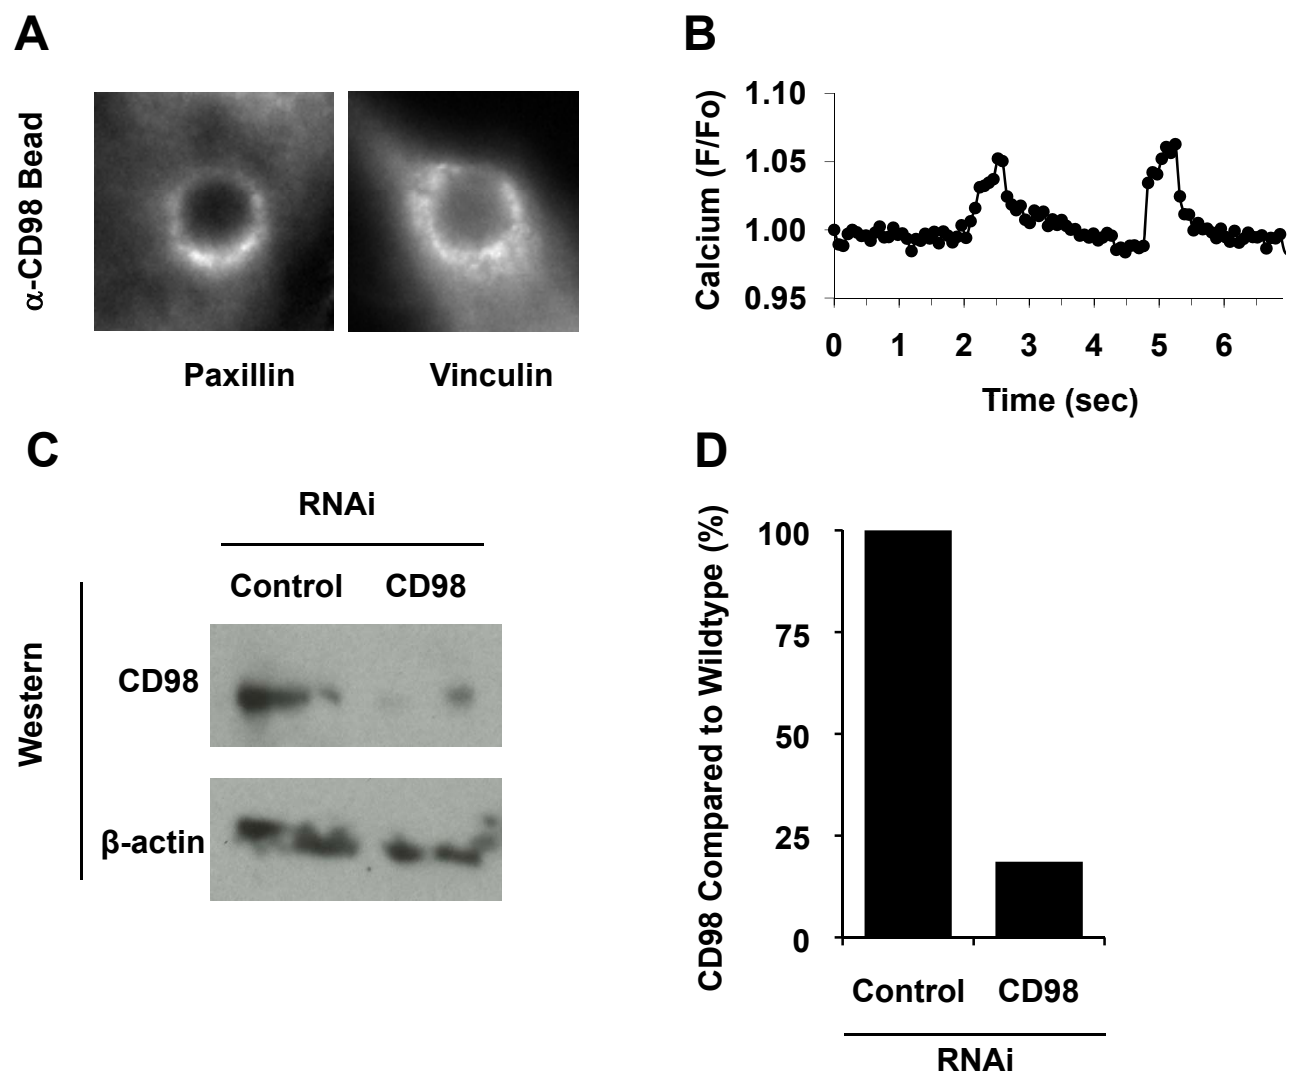

Fig. S10

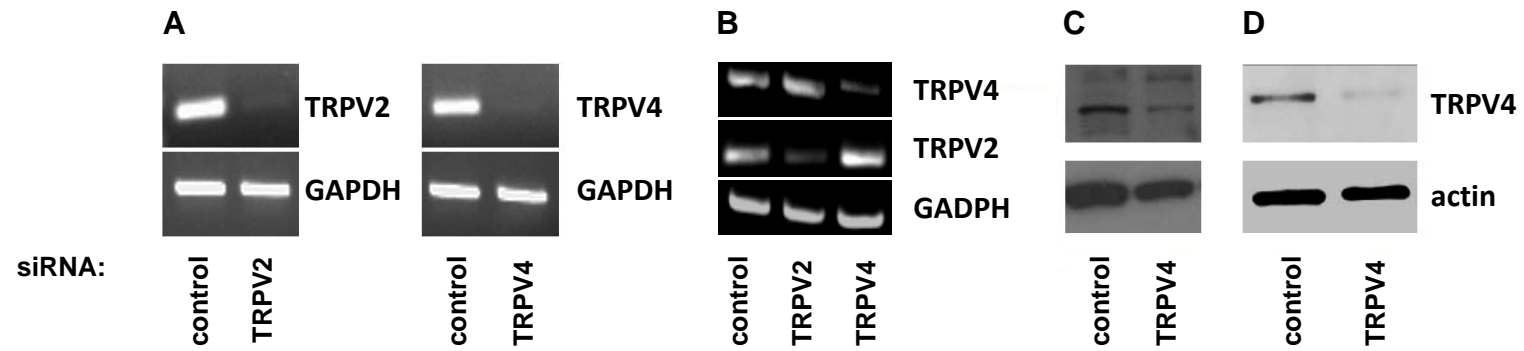

Supplement: NIHMS306390-supplement-supplement_1.pdf [file NIHMS306390-supplement-supplement_1.pdf]
